# Supplementary material for: Jupyter Book as an open online teaching environment in the geosciences: lessons learned from Geo-SfM and Geo-UAV
Source: Copernicus journal article supplement (doi:10.5194/gc-8-51-2025), 2025-02-17
Supplement: Supplementary file 1 [file gc-8-51-2025-supplement.pdf]

Supplement of Geosci. Commun., 8, 51–65, 2025  
<https://doi.org/10.5194/gc-8-51-2025-supplement>  
© Author(s) 2025. CC BY 4.0 License.

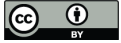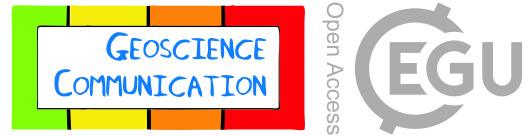

*Supplement of*

## **Jupyter Book as an open online teaching environment in the geosciences: lessons learned from Geo-SfM and Geo-UAV**

**Peter Betlem et al.**

*Correspondence to:* Peter Betlem ([peter.betlem@ngi.no](mailto:peter.betlem@ngi.no))

The copyright of individual parts of the supplement might differ from the article licence.

**Table S1: Questions and answer types for the student surveys on the JupyterBook/GitHub framework.**

| Question/statement                                                                                                                                              | Answers                   | Ref.    |
|-----------------------------------------------------------------------------------------------------------------------------------------------------------------|---------------------------|---------|
| <b>BACKGROUND INFORMATION</b>                                                                                                                                   |                           |         |
| I am affiliated/enrolled with UNIS...                                                                                                                           | YES   NO                  |         |
| My (educational/scientific) background mostly corresponds to....Biology                                                                                         | YES   NO                  |         |
| My (educational/scientific) background mostly corresponds to....Geology                                                                                         | YES   NO                  |         |
| My (educational/scientific) background mostly corresponds to....Geophysics                                                                                      | YES   NO                  |         |
| My (educational/scientific) background mostly corresponds to....Technology                                                                                      | YES   NO                  |         |
| My (educational/scientific) background mostly corresponds to....Safety                                                                                          | YES   NO                  |         |
| My (educational/scientific) background mostly corresponds to....Guiding                                                                                         | YES   NO                  |         |
| My (educational/scientific) background mostly corresponds to....Other                                                                                           | YES   NO                  |         |
| <b>BACKGROUND KNOWLEDGE</b>                                                                                                                                     |                           |         |
| I was familiar with programming (e.g., Python, R, matlab)                                                                                                       | -   -   +   +   +   +   + | Fig. B1 |
| I was familiar with Jupyter Notebook/Lab                                                                                                                        | -   -   +   +   +   +   + | Fig. B1 |
| I was familiar with Jupyter Book/Executable Book Project/Sphinx/Read The Docs                                                                                   | -   -   +   +   +   +   + | Fig. B1 |
| I was familiar with YouTube                                                                                                                                     | -   -   +   +   +   +   + | Fig. B1 |
| I was familiar with animated GIFs                                                                                                                               | -   -   +   +   +   +   + | Fig. B1 |
| I was familiar with git (e.g., GitHub)                                                                                                                          | -   -   +   +   +   +   + | Fig. B1 |
| <b>DEVICE USED</b>                                                                                                                                              |                           |         |
| I used the following device to read/interact with the compendiums:.Mobile phone                                                                                 | YES   NO                  |         |
| I used the following device to read/interact with the compendiums:.Tablet                                                                                       | YES   NO                  |         |
| I used the following device to read/interact with the compendiums:.Desktop                                                                                      | YES   NO                  |         |
| <b>RATINGS AND OBJECTIVES</b>                                                                                                                                   |                           |         |
| What were your (learning) objectives when following the XXX Compendium?                                                                                         | Open                      |         |
| Future documentations - your compendium ideas?                                                                                                                  | Open                      |         |
| Rate your overall experience of using the XXX Compendium on a scale from 0 to 10, with 0 being extremely dissatisfied and 10 being extremely satisfied.         | 0 to 10                   |         |
| Rate your overall experience of learning with the XXX Compendium on a scale from 0 to 10, with 0 being extremely dissatisfied and 10 being extremely satisfied. | 0 to 10                   |         |
| <b>COMPENDIUM INFORMATION</b>                                                                                                                                   |                           |         |
| The XXX Compendium met my needs                                                                                                                                 | -   -   +   +   +   +   + | Fig 2   |
| The topics covered by the XXX Compendium were relevant to the course                                                                                            | -   -   +   +   +   +   + | Fig 2   |
| The XXX Compendium pages were easy to navigate                                                                                                                  | -   -   +   +   +   +   + | Fig 2   |
| The XXX Compendium content was clear                                                                                                                            | -   -   +   +   +   +   + | Fig 2   |
| The XXX Compendium content was too difficult                                                                                                                    | -   -   +   +   +   +   + | Fig 2   |
| I enjoyed using the XXX Compendium                                                                                                                              | -   -   +   +   +   +   + | Fig 2   |
| I would recommend the XXX Compendium to others                                                                                                                  | -   -   +   +   +   +   + | Fig 2   |
| I will use/have used the XXX Compendium after the module ended                                                                                                  | -   -   +   +   +   +   + | Fig 2   |
| What did you like most about the XXX Compendium? Try to come up with at least two examples.                                                                     | Open                      | Table 1 |
| What did you like least about the XXX Compendium? Try to come up with at least two examples.                                                                    | Open                      | Table 1 |
| <b>MULTIMEDIA QUESTIONS</b>                                                                                                                                     |                           |         |
| The animated GIFs and videos explained the content clearly                                                                                                      | -   -   +   +   +   +   + | Fig. 3  |
| The animated GIFs and videos supplemented and clarified the text                                                                                                | -   -   +   +   +   +   + | Fig. 3  |

Table S1 continued ...

... Table S1 continued

| Question/statement                                                                                          | Answers                      | Ref.     |
|-------------------------------------------------------------------------------------------------------------|------------------------------|----------|
| The use of animated GIFs and videos helped me better understand the material                                | -   -   +   +   +   +   +    | Fig. 3   |
| The quality of the animated GIFs was high                                                                   | -   -   +   +   +   +   +    | Fig. 3   |
| The quality of the videos was high                                                                          | -   -   +   +   +   +   +    | Fig. 3   |
| The animated GIFs played too fast                                                                           | -   -   +   +   +   +   +    | Fig. 3   |
| The videos played too fast                                                                                  | -   -   +   +   +   +   +    | Fig. 3   |
| The animated GIFs lasted too long                                                                           | -   -   +   +   +   +   +    | Fig. 3   |
| The videos lasted too long                                                                                  | -   -   +   +   +   +   +    | Fig. 3   |
| Being able to pause the animated GIFs would be useful                                                       | -   -   +   +   +   +   +    | Fig. 3   |
| A voice-over/spoken instruction would make the animations and videos better to understand                   | -   -   +   +   +   +   +    | Fig. 3   |
| I typically watched the videos at faster playback speeds                                                    | -   -   +   +   +   +   +    | Fig. 3   |
| I typically watched the videos at slower playback speeds                                                    | -   -   +   +   +   +   +    | Fig. 3   |
| On average, I rewatched individual animated GIFs x times                                                    | 0   1   - 3   4 - 6   7 - 10 | Table B2 |
| On average, I rewatched individual YouTube videos x times                                                   | 0   1   - 3   4 - 6   7 - 10 | Table B2 |
| On average, I paused YouTube videos x times                                                                 | 0   1   - 3   4 - 6   7 - 10 | Table B2 |
| What did you like about the mixed use of animated GIFs and videos in the compendiums? What worked?          | Open                         | Table 1  |
| What did you dislike about the mixed use of animated GIFs and videos in the compendiums? What did not work? | Open                         | Table 1  |
| <b>DID YOU KNOW?</b>                                                                                        |                              |          |
| Individual compendium pages can be generated as PDFs from within the pages themselves?                      | YES   NO                     |          |
| You can contribute and suggest changes directly from the compendium pages?                                  | YES   NO                     |          |
| The raw material for each compendium is openly available on GitHub?                                         | YES   NO                     |          |
| GitHub hosts an issue and bug tracker for each of the compendiums?                                          | YES   NO                     |          |
